# Supplementary material
Source: PubMed Central journal article supplement (PMC5986104)

**A**

| Chimp        | NOTCH2NL exons | Additional Genome Support                                      | Breakpoint Coordinates (hg38 BLAT) |
|--------------|----------------|----------------------------------------------------------------|------------------------------------|
| ΔExon2 only  | 1,3-5          |                                                                |                                    |
| ΔExon2       | 1,3-5          | BAC: CH251-414E24                                              | chr1:148,675,676-148,623,447       |
| LRIG         |                |                                                                |                                    |
| ΔExon2       | 1,3-5          | BAC:CH251-305M22<br>BAC:CH251-397N13                           | chr1:148,675,676-148,623,447       |
| ΔExon2       | 1,3-5          | BAC:CH251-243D3<br>BAC:CH251-485H13                            | chr1:148,675,676-148,623,447       |
| MAGI3 5' 3-5 |                | WGS:AACZ03011046.1<br>WGS:AADA01172734.1                       | chr1:113,651,659-146,175,285       |
| MAGI3 3' 3-5 |                | WGS:AACZ03149796.1<br>WGS:AADA01170825.1                       | chr1:113,536,139-146,169,274       |
| TXNIP        | 2-5            | WGS:AACZ03149820.1                                             | chr1:145,995,530-146,226,704       |
| PDE4DIP      | 2-5            | WGS:AADA01102044.1<br>WGS:AACZ03011197.1<br>WGS:AACZ03149689.1 | chr1:149,005,377-149,426,133       |
| NOTCH2       | 1-5            |                                                                |                                    |

**B**

| Gorilla | NOTCH2NL exons | Genome Support                                                                           | Breakpoint Coordinates (hg38 BLAT)                            |
|---------|----------------|------------------------------------------------------------------------------------------|---------------------------------------------------------------|
| PDE4DIP | 2-5            | BAC: CH277-26C18<br>TI: 1679409700<br>TI: 2019116386<br>TI: 1680614711<br>TI: 2192386756 | chr1:149,005,377-149,426,133                                  |
| MAGI3   | 3-5            | TI: 1671716786<br>TI: 1671781255<br>TI: 2033420236                                       | chr1:113,651,629-146,175,285                                  |
| BRD9    | 3-5            | BAC: CH277-57H6                                                                          | chr1:147,069,489-148,619,452<br>chr5:872,995-chr1:147,072,407 |

**C**

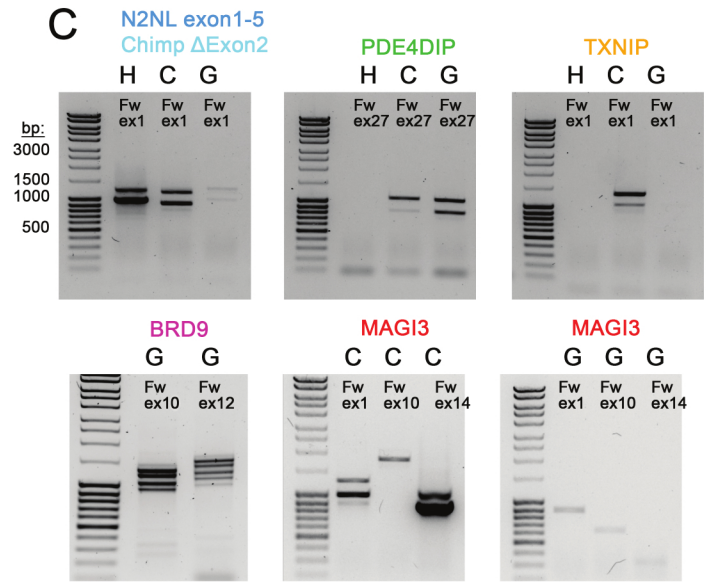

**D**

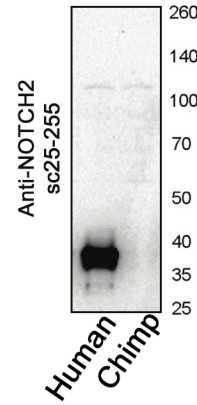

**F**

LCA genes \* Frameshift splice junction ✓ In-frame splice junction ✗ Stop codon

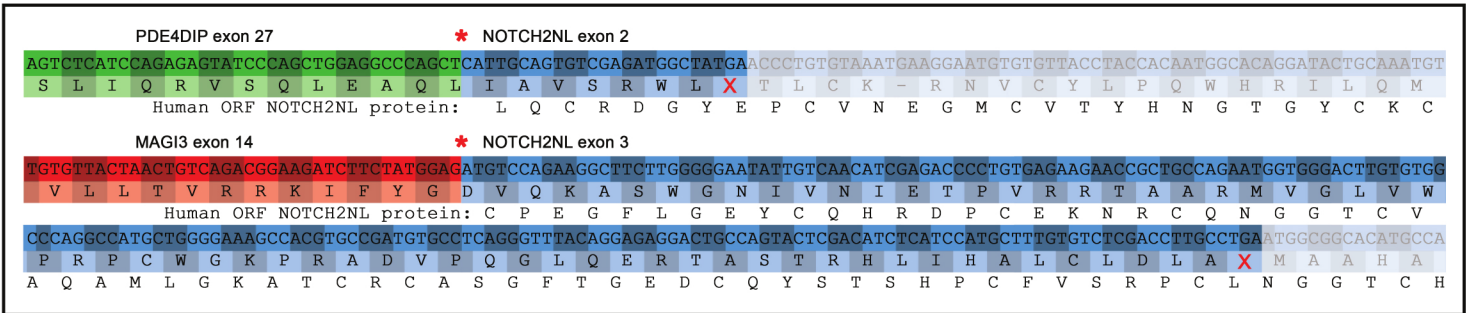

**Chimpanzee specific genes**

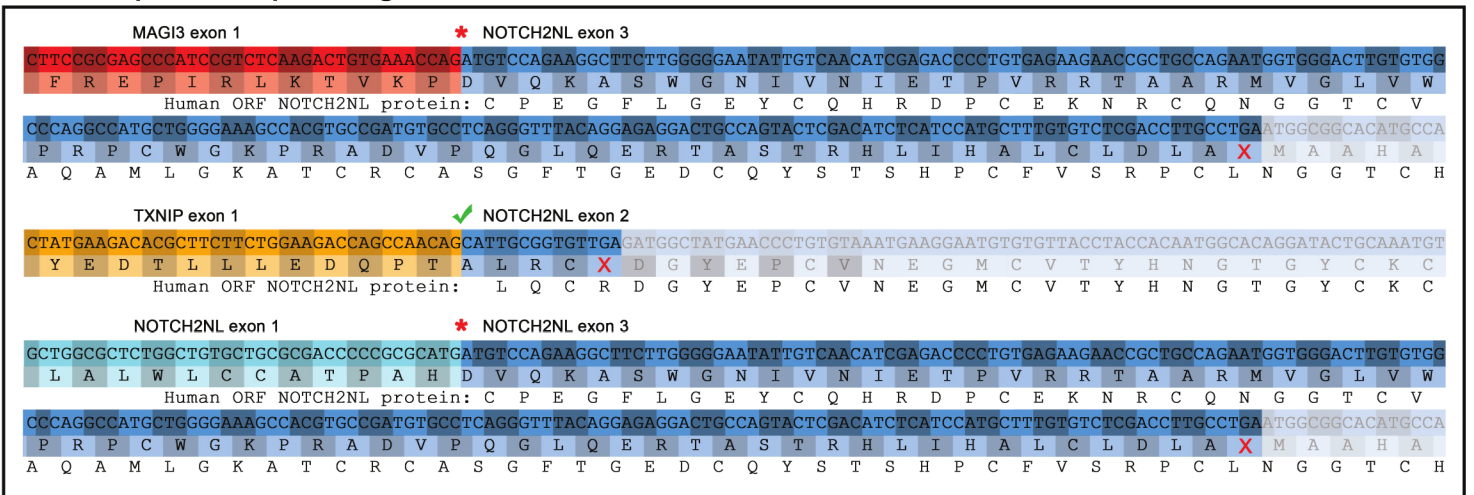

**Gorilla specific genes**

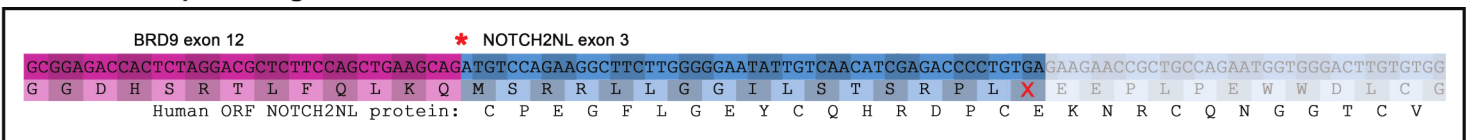

Supplement: NIHMS955026-supplement-3.pdf [file NIHMS955026-supplement-3.pdf]
