# Supplementary material
Source: PubMed Central journal article supplement (PMC5986104)

**A**

|           | NOTCH2 | NOTCH2NLR     | NOTCH2NLA      | NOTCH2NLB      | NOTCH2NLC      |
|-----------|--------|---------------|----------------|----------------|----------------|
| NOTCH2    | 100%   | 99.46% (95kb) | 99.13% (176kb) | 99.19% (332kb) | 99.14% (105kb) |
| NOTCH2NLR | 98.19% | 100%          | 98.74% (133kb) | 98.72% (132kb) | 99.04% (106kb) |
| NOTCH2NLA | 98.90% | 98.54%        | 100%           | 99.69% (249kb) | 99.31% (115kb) |
| NOTCH2NLB | 98.89% | 98.53%        | 99.54%         | 100%           | 99.32% (115kb) |
| NOTCH2NLC | 98.91% | 98.37%        | 99.45%         | 99.45%         | 100%           |

% Sequence identity over NOTCH2NL region (Alignment region length)  
 % Sequence identity over NOTCH2NL exon 1-5

**B**

**Exon 5:**

**N2NLA, B, C**  
 AAACAGTGAGA----AGAGGAACAGAGCTCTGGGAAAGAGACAGGGAAGTCTGGAATGGAAAAGAACACGATGAGAATTAG  
 T V R R G T E L W E R D R E V W N G K E H D E N -

**N2NLR, (NOTCH2)**  
 AAACAGTGAGAAATAAGAGGAACAGAGCTCTGGGAAAGAGACAGGGAAGTCTGGAATGGAAAAGAACACGATGAGAATTAG  
 T V R I K R N R A L G K R Q G S L E W K R T R - E L

**C**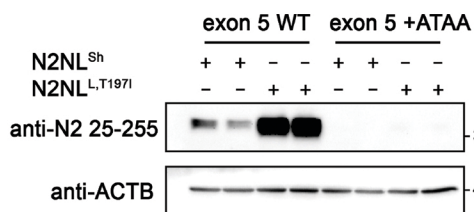**D**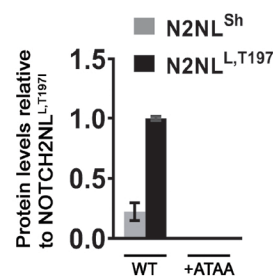**E**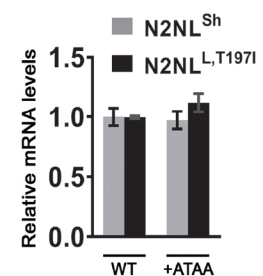**F**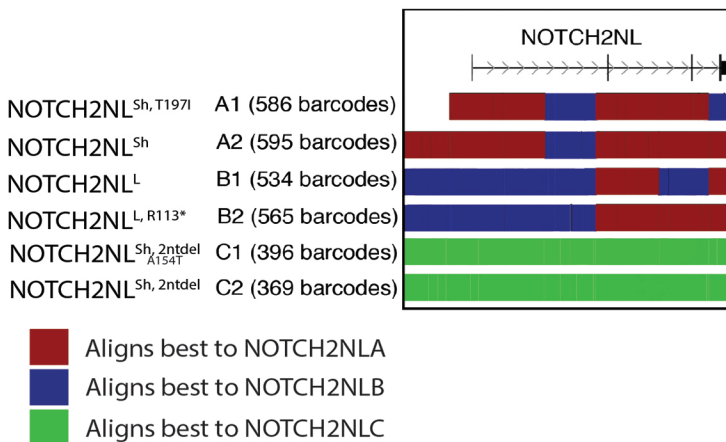**G**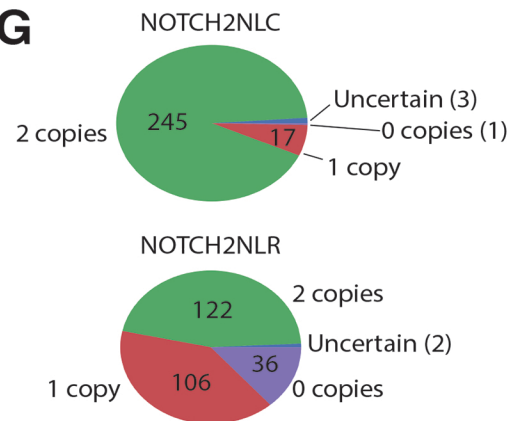**H**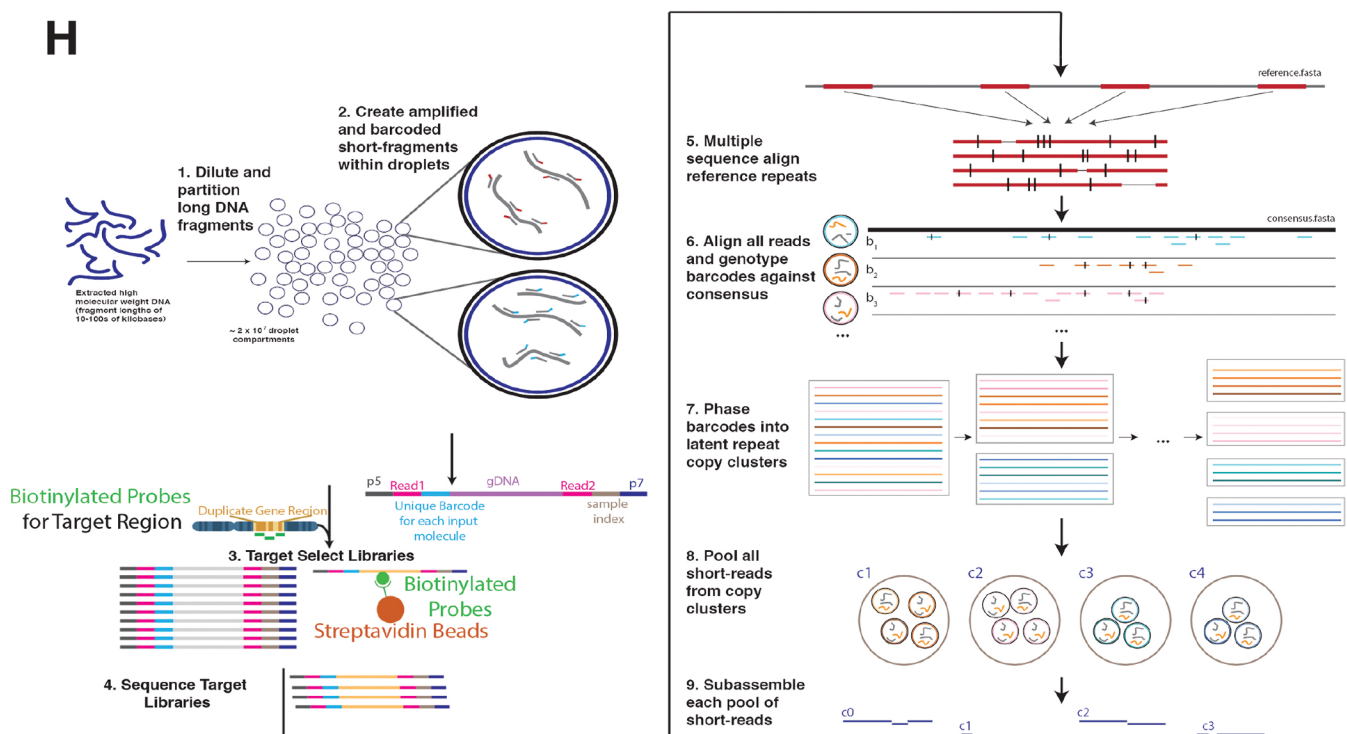

Supplement: NIHMS955026-supplement-1.pdf [file NIHMS955026-supplement-1.pdf]
