# Supplementary material
Source: PubMed Central journal article supplement (PMC5986104)

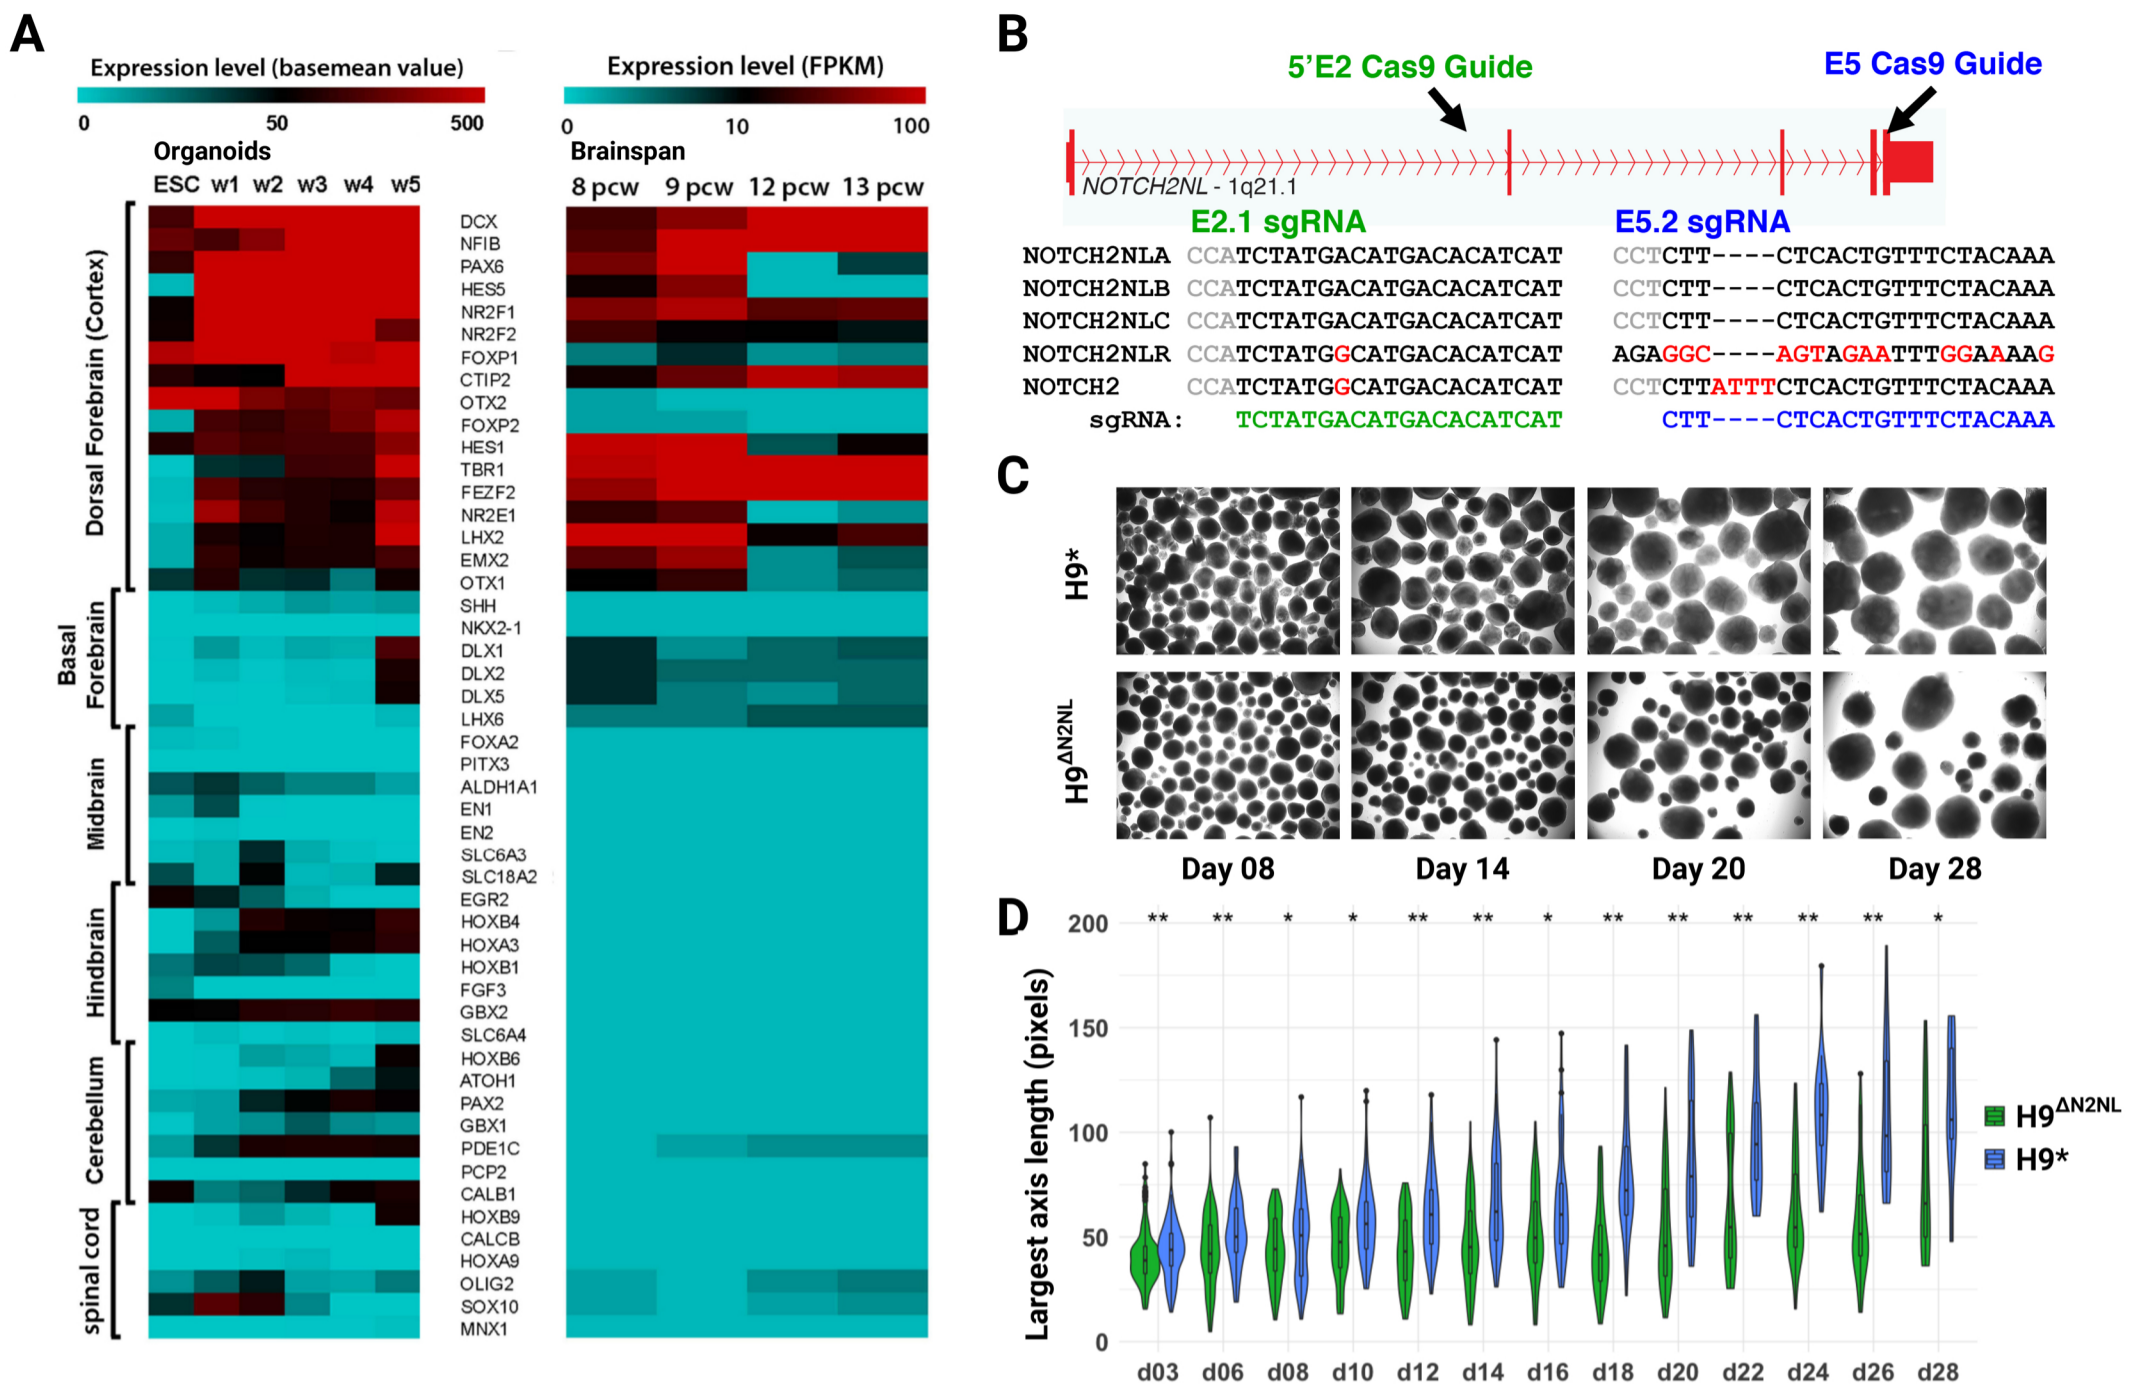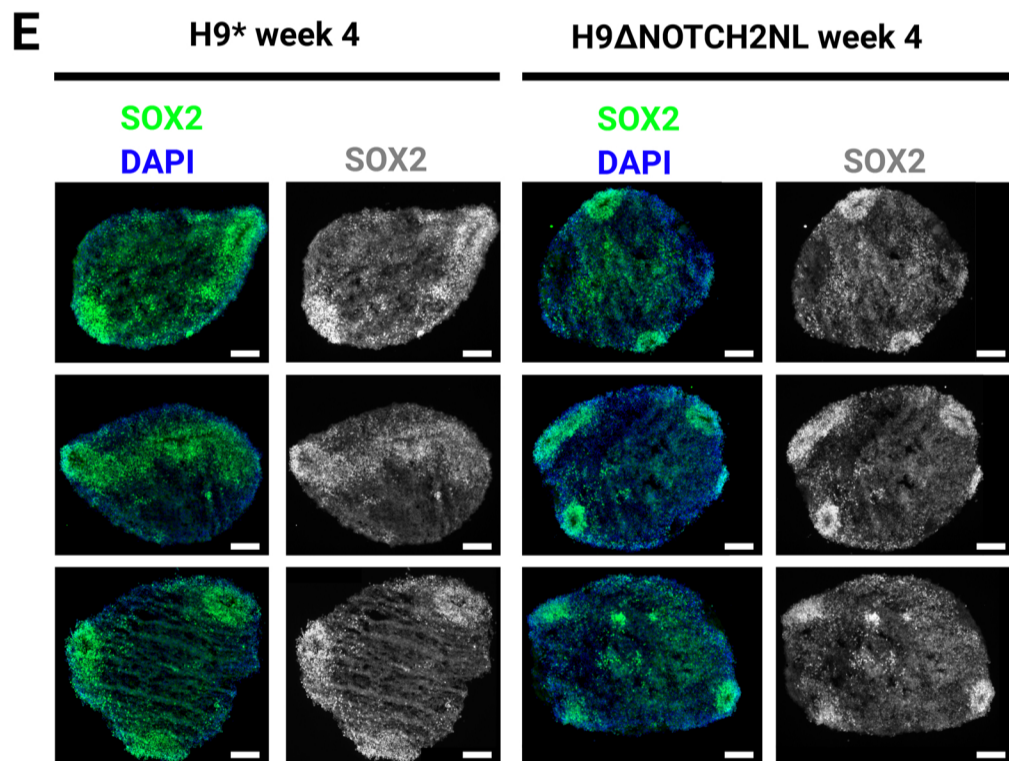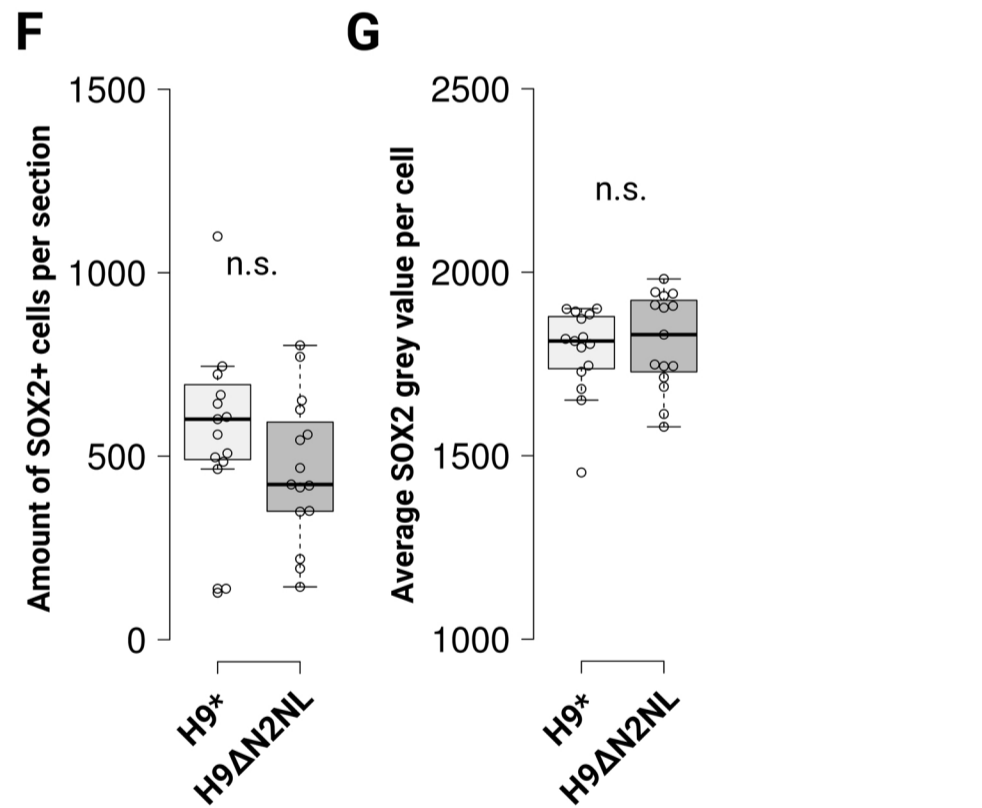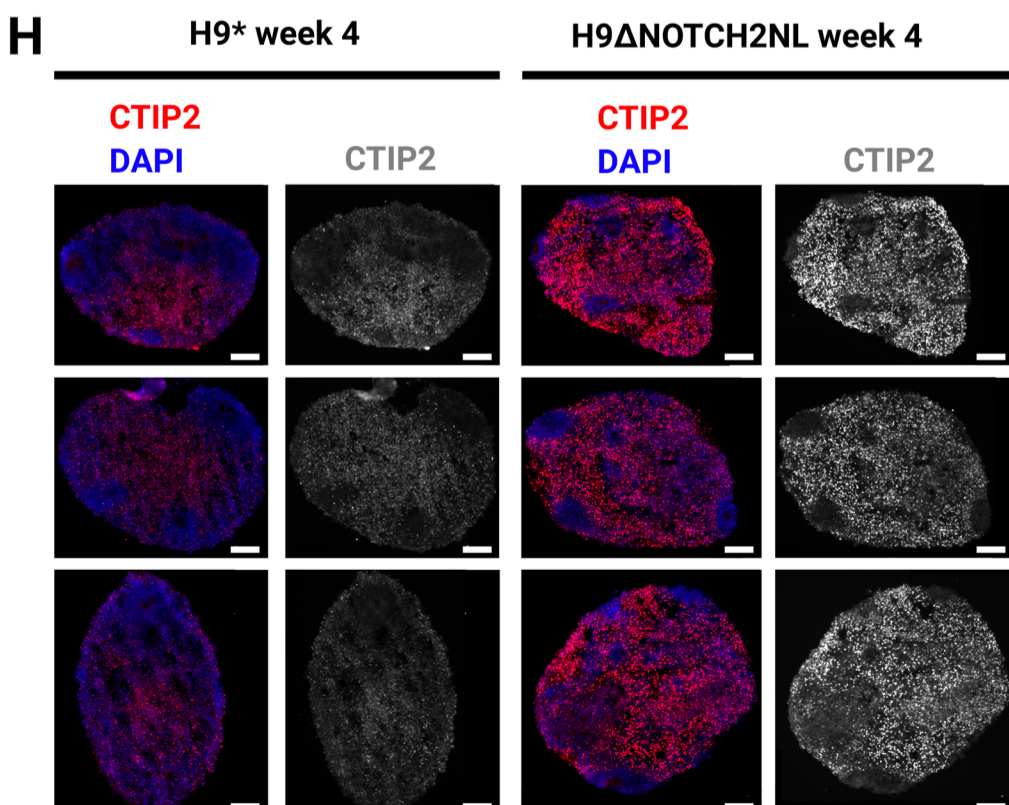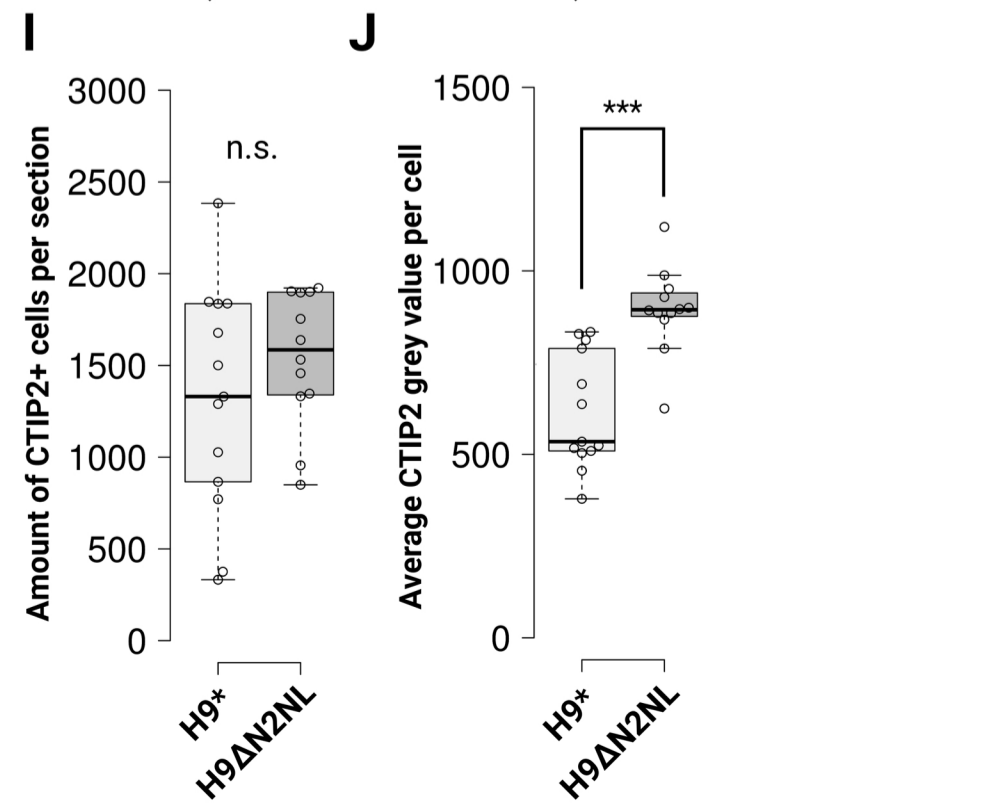

Supplement: NIHMS955026-supplement-11.pdf [file NIHMS955026-supplement-11.pdf]

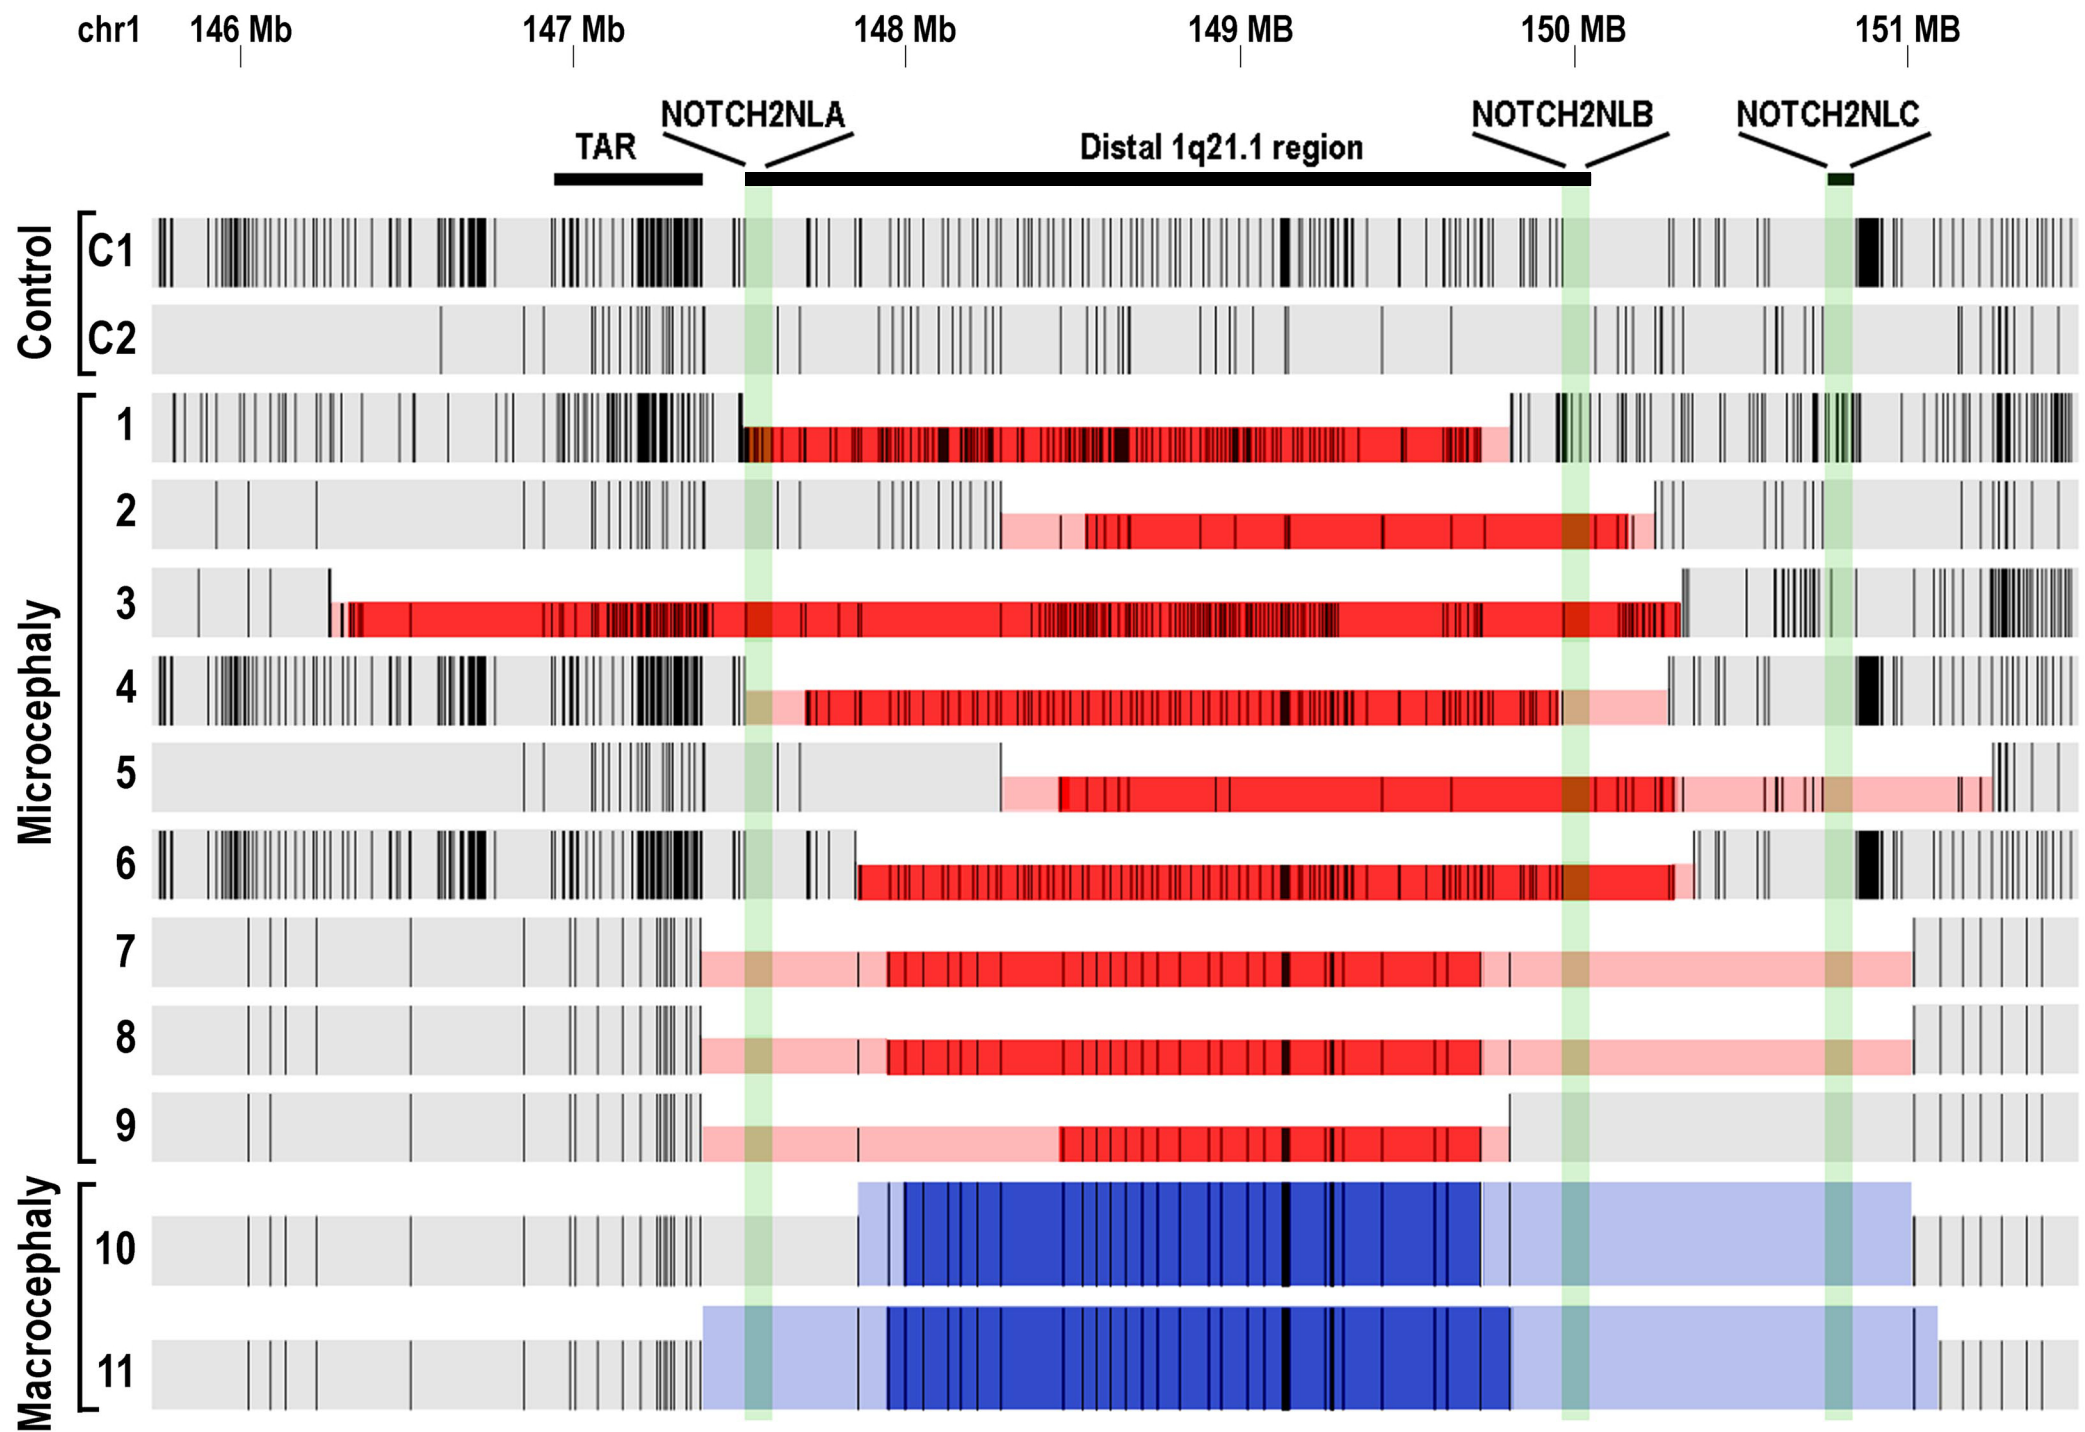

Supplement: NIHMS955026-supplement-2.pdf [file NIHMS955026-supplement-2.pdf]

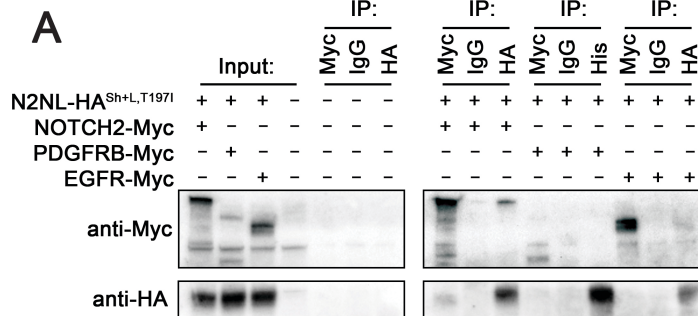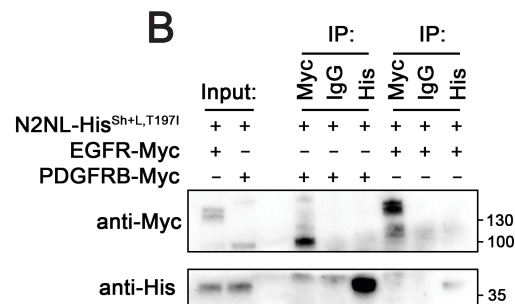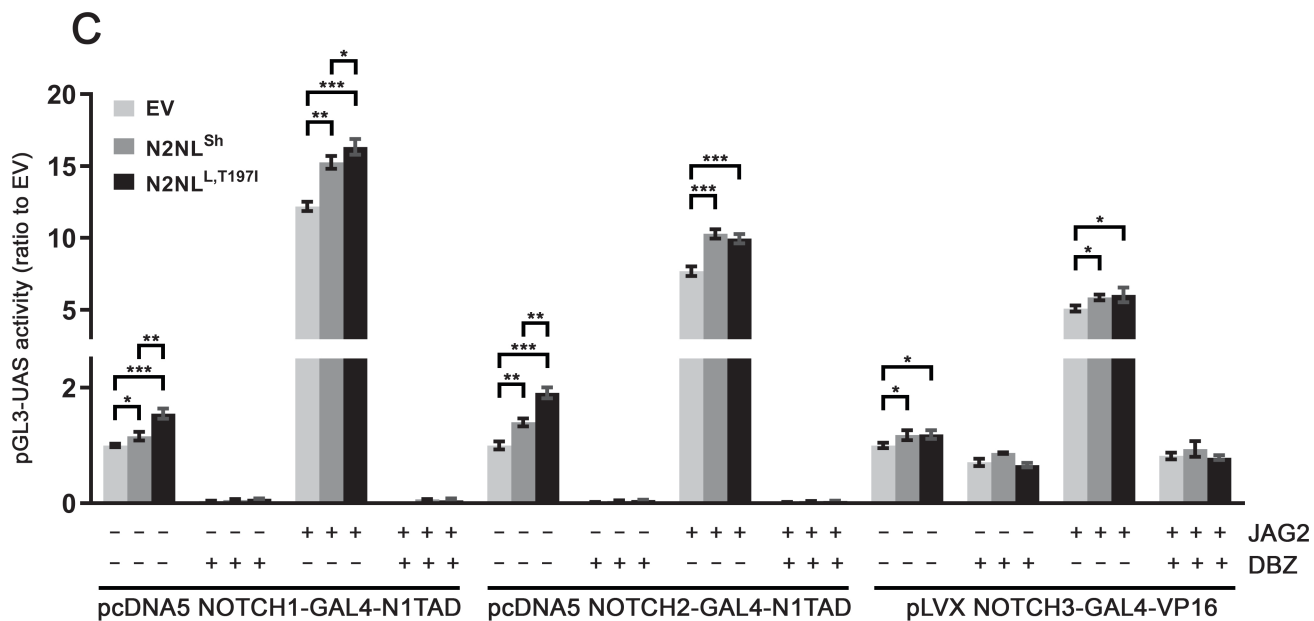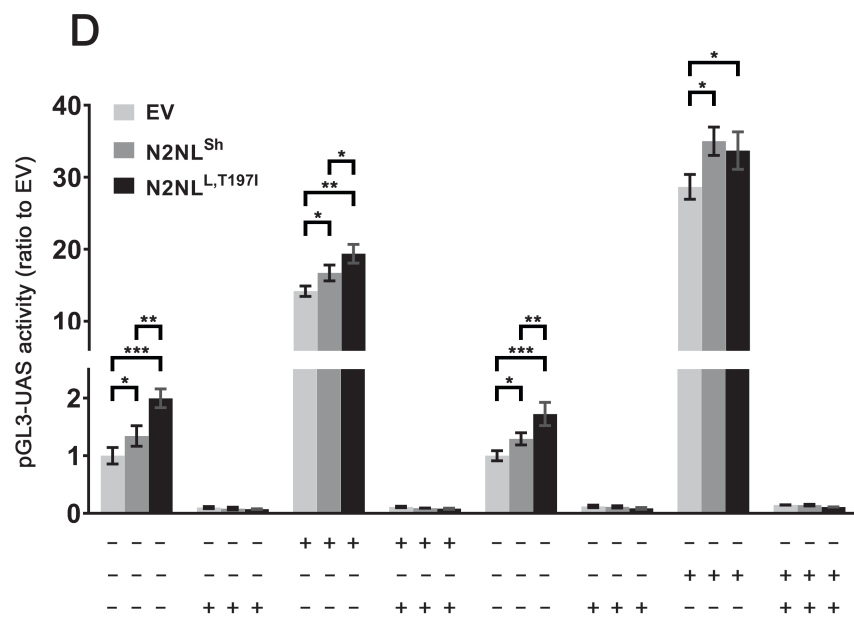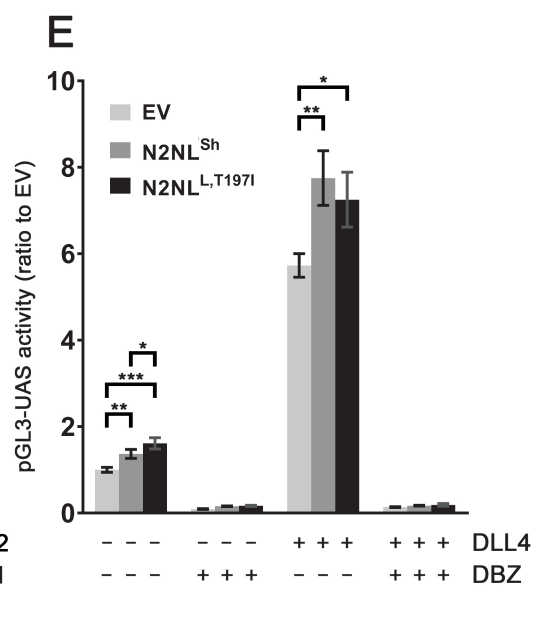

Supplement: NIHMS955026-supplement-4.pdf [file NIHMS955026-supplement-4.pdf]

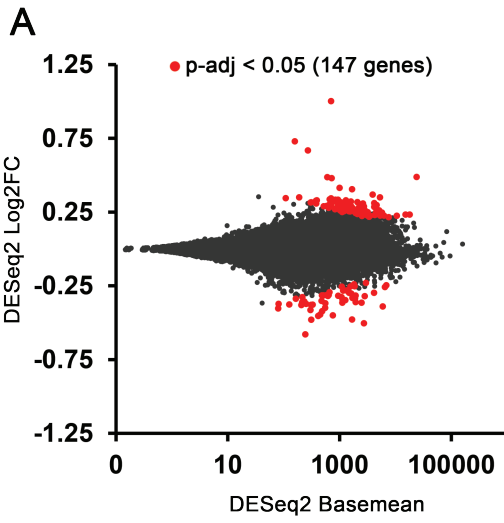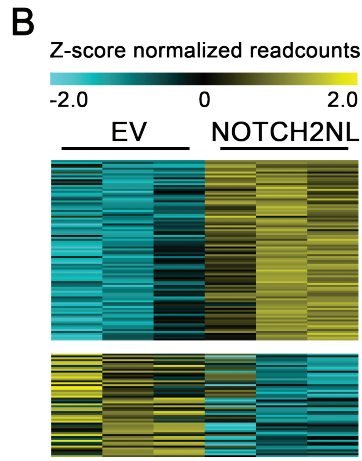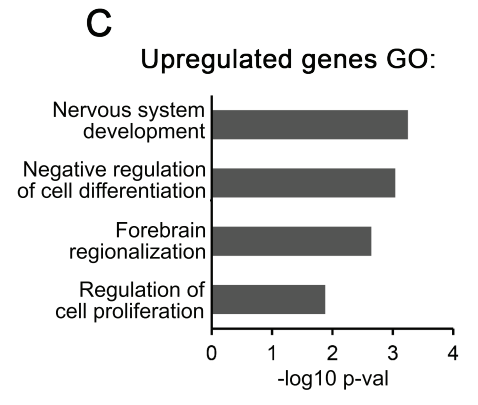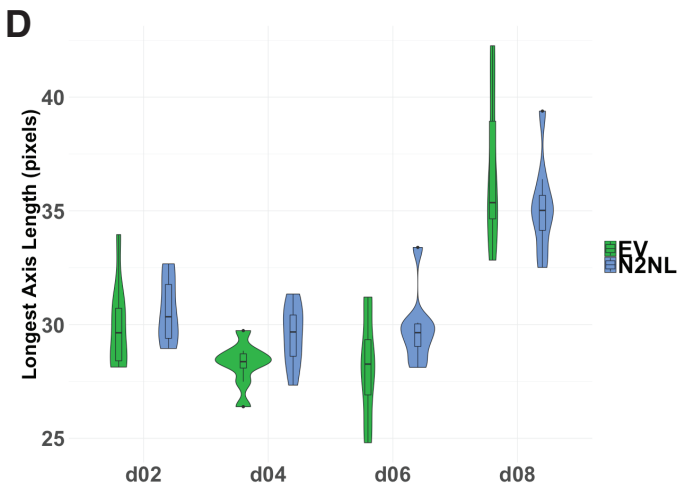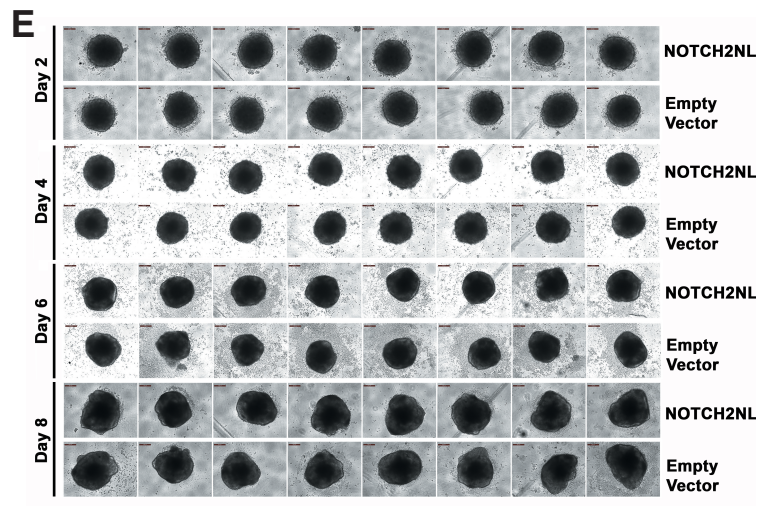

Supplement: NIHMS955026-supplement-5.pdf [file NIHMS955026-supplement-5.pdf]

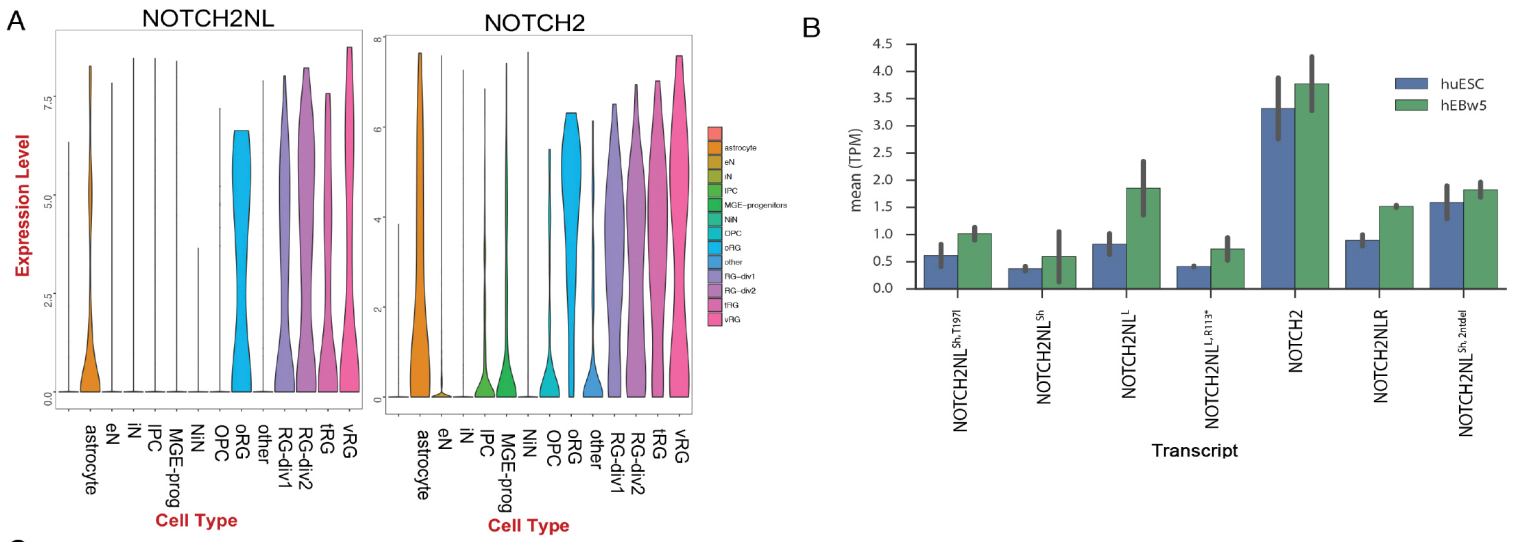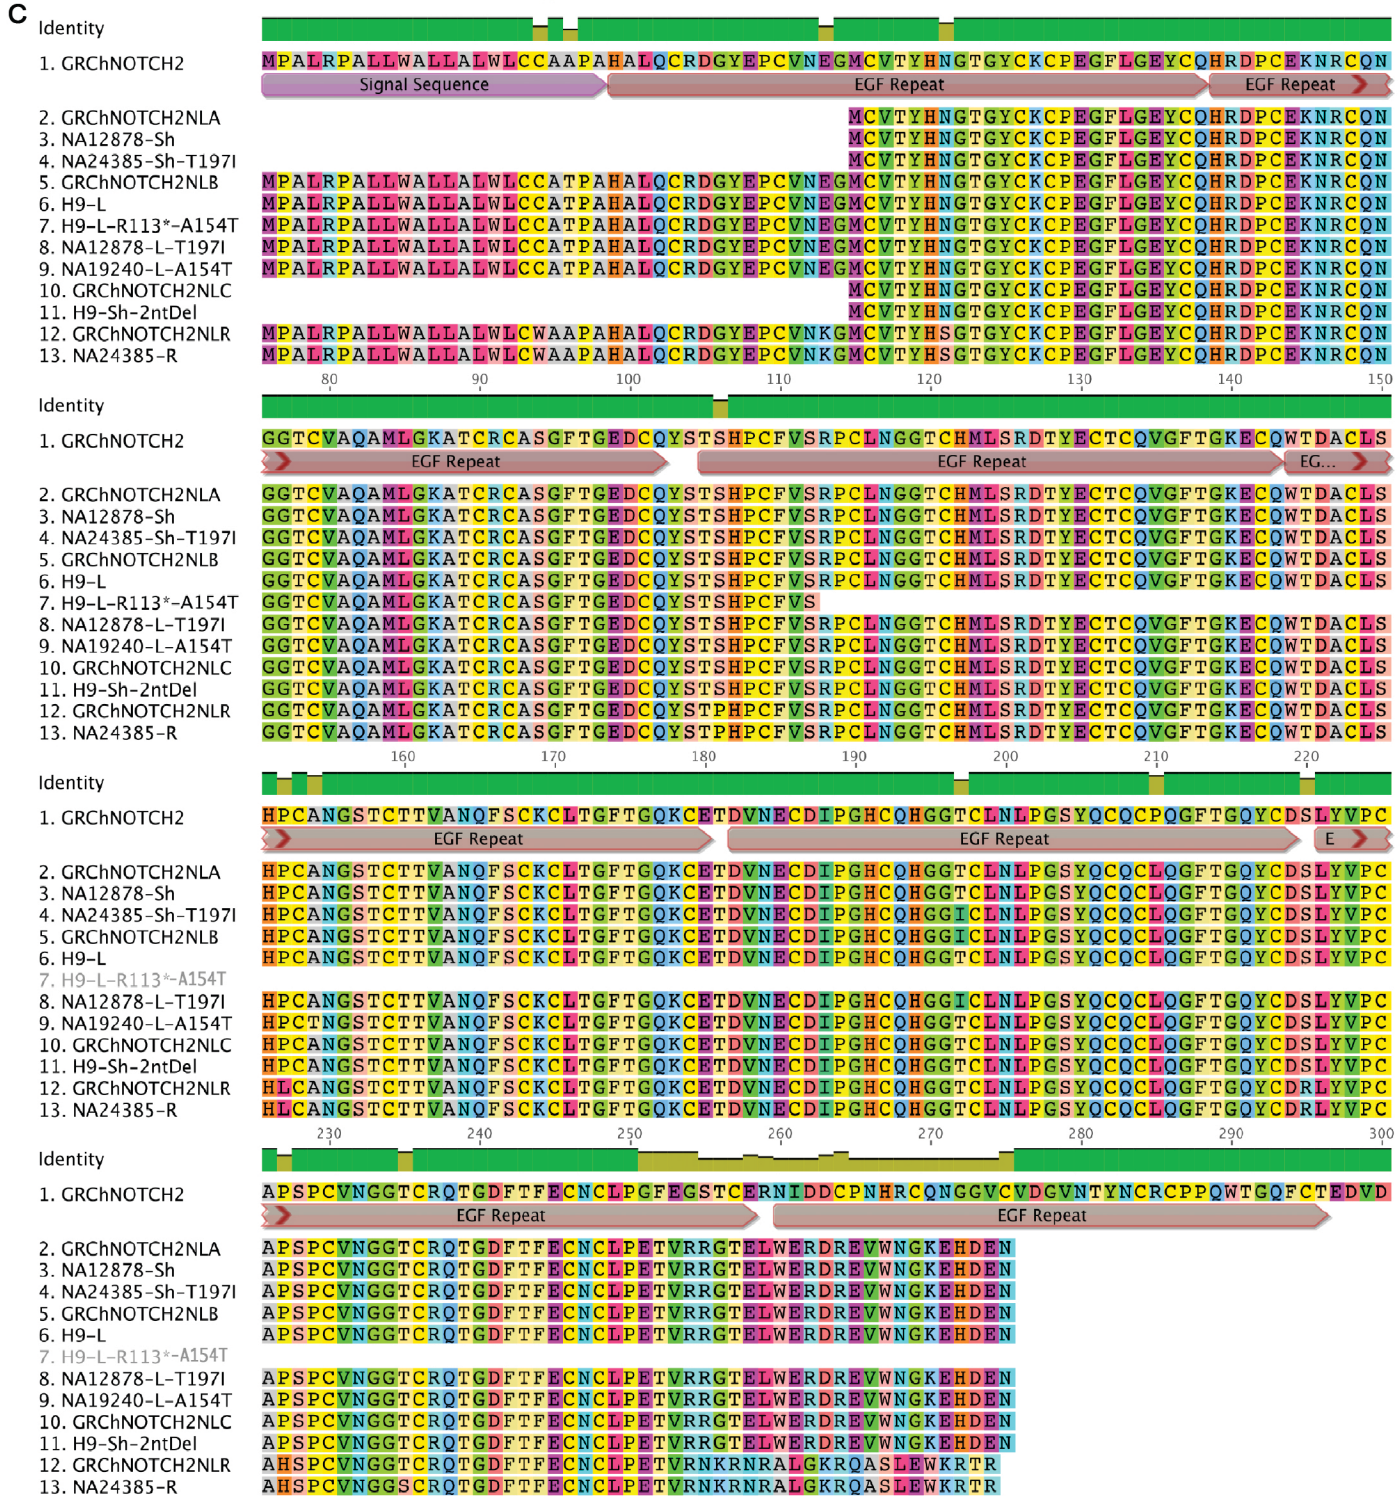

Supplement: NIHMS955026-supplement-6.pdf [file NIHMS955026-supplement-6.pdf]
